# Supplementary material for: Effects of elevated temperature and CO2 on intertidal microphytobenthos
Source: PubMed Central journal article supplement (PMC4411721; doi:10.1186/s12898-015-0043-y), 2015-04-01

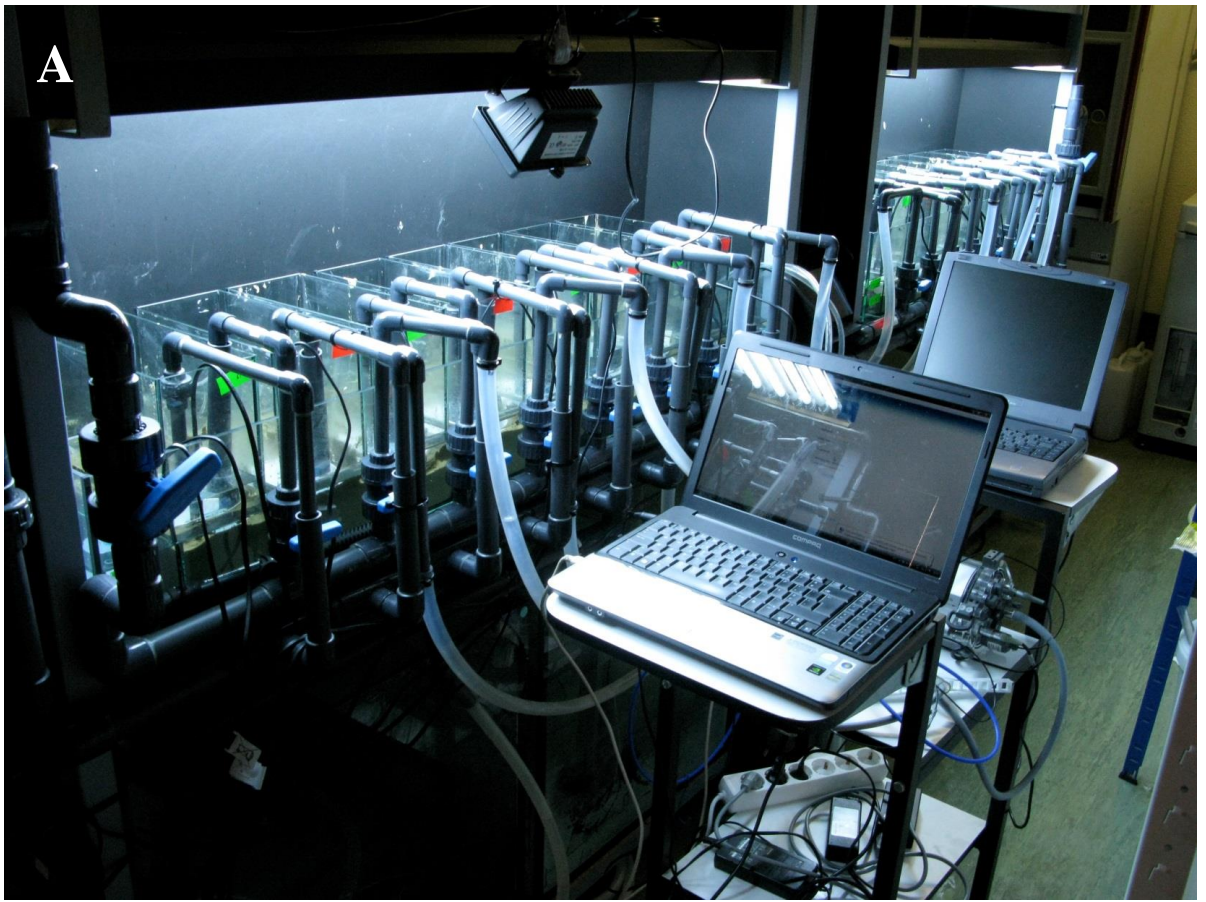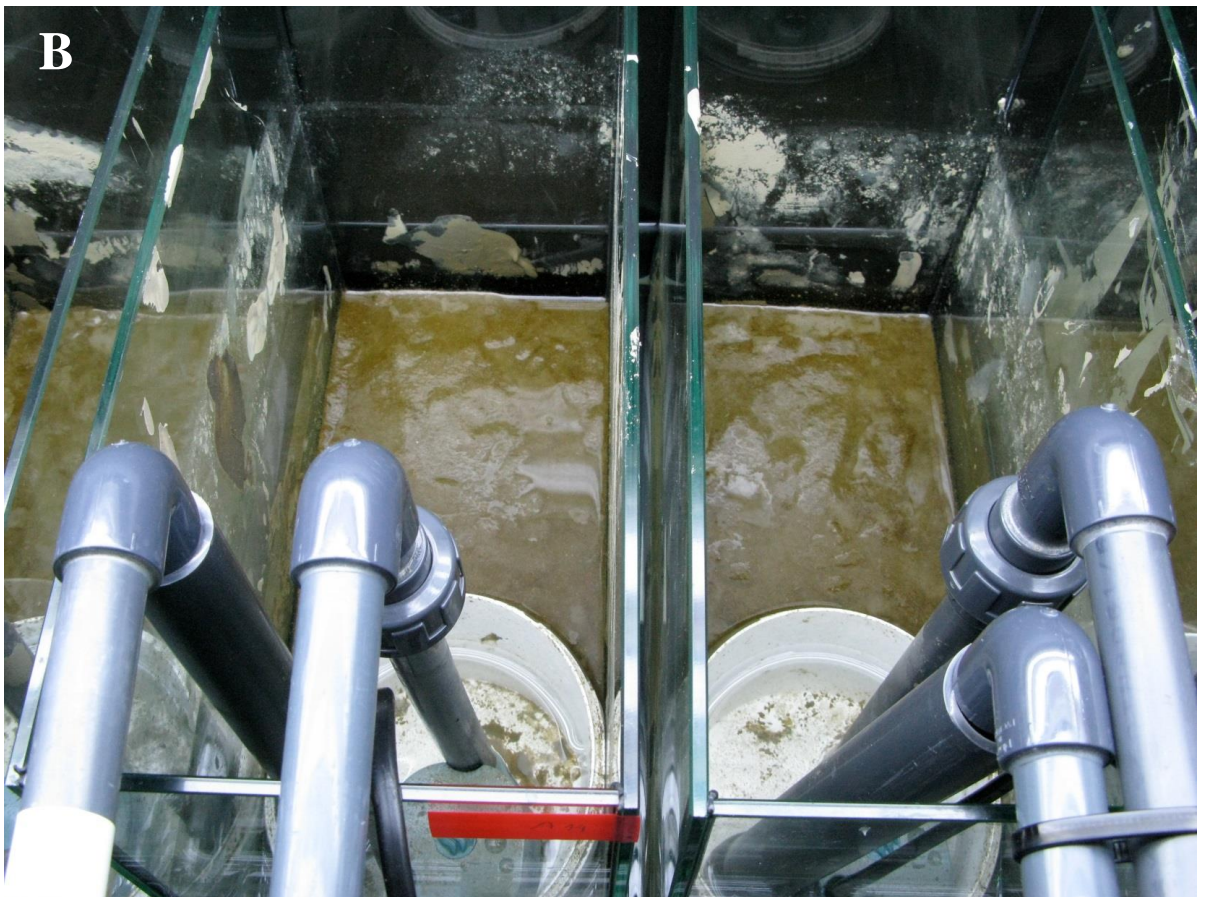

Supplement: 12898_2015_43_MOESM1_ESM.pdf [file 12898_2015_43_MOESM1_ESM.pdf]
